# Supplementary material
Source: publisher site journal article supplement (http://www.degruyter.com/publication/journal_key/FCA/downloadAsset/FCA_Guidelines%20for%20reviewers.pdf)
Supplement: Supplementary file 1 [file FCA_Guidelines%20for%20reviewers.pdf]

## **Your contribution**

We greatly appreciate the time and effort given by reviewers in evaluating papers for publication in our journal. Thanks to your contribution and expertise, the authors in FCAA journal receive fast, fair and comprehensive reviews.

## **Our standards**

- Our reviewers are kindly requested to deliver reports in 40 days
- Research articles are reviewed by a minimum of two reviewers
- We pay special attention to receive unbiased, fair opinions
- Whenever submission qualifies for publication but needs revision, reviewers are asked to give comprehensive opinion on necessary improvements
- Although the Referee Form consists of some formal questionnaire's items to fill in, most important for our decision and for author's revision will be your informal comments given in "Comments / Suggestions to the author", "Comments to the editor" and "Referee's Recommendation".

## **Tools**

- Please, use "[FCAA\\_Referee\\_Form.doc](#)" (or "[FCAA\\_Referee\\_Form.pdf](#)").
- It should be returned in electronic form to the Managing Editor (V. Kiryakova), by e-mail [Virginia@diogenes.bg](mailto:Virginia@diogenes.bg)

There is information on the second page of the referee form that will be kept confidential: including your name, remarks to the editor only, etc. So, either send the form in text format (MsWord \*.doc, \*.rtf) and accompany with the LaTeX produced part (only if necessary for Maths); or if the file is pdf or scan format, take care that this confidential stuff goes on next separate page.
